# Supplementary material
Source: HighWire-hosted journal article supplement (https://www.cmaj.ca/highwire/filestream/57951/field_highwire_adjunct_files/0/support-lipman-online_table_3.pdf)
Supplement: support-lipman-online_table_3.pdf [file support-lipman-online_table_3.pdf]

**e-Table 3:** Estimated growth (changes in outcomes over time) and differences in adjusted mean outcome scores\* at baseline and at third follow-up visit among single mothers in the intervention and control groups

| Outcome measure;<br>group          | Estimated<br>growth,<br>$\beta_1$ (SE) | Adjusted mean<br>score at<br>baseline,<br>$\beta_0$ (SE) | Adjusted mean score<br>at third follow-up<br>visit,<br>$\beta_3$ (SE) |
|------------------------------------|----------------------------------------|----------------------------------------------------------|-----------------------------------------------------------------------|
| <b>Mood</b>                        |                                        |                                                          |                                                                       |
| Control                            | -1.45 (0.41) <sup>†</sup>              | 18.38 (2.17) <sup>†</sup>                                | 12.22 (2.24) <sup>†</sup>                                             |
| $\Delta$ Intervention –<br>Control | 0.15 (0.56)                            | -2.94 (1.99)                                             | -2.30 (2.15)                                                          |
| <b>Self-esteem</b>                 |                                        |                                                          |                                                                       |
| Control                            | -0.30 (0.15) <sup>‡</sup>              | 19.32 (1.04) <sup>†</sup>                                | 18.04 (1.03) <sup>†</sup>                                             |
| $\Delta$ Intervention –<br>Control | -0.33 (0.20)                           | 0.26 (0.93)                                              | -1.16 (0.92)                                                          |
| <b>Social support</b>              |                                        |                                                          |                                                                       |
| Control                            | -1.15 (0.34) <sup>†</sup>              | 47.59 (2.32) <sup>†</sup>                                | 42.70 (2.36) <sup>†</sup>                                             |
| $\Delta$ Intervention –<br>Control | -0.35 (0.47)                           | 1.25 (2.06)                                              | -0.25 (2.16)                                                          |
| <b>Parenting</b>                   |                                        |                                                          |                                                                       |
| Control                            | -1.61 (0.60) <sup>§</sup>              | 97.12 (3.98) <sup>†</sup>                                | 90.30 (3.99) <sup>†</sup>                                             |
| $\Delta$ Intervention –<br>Control | 0.36 (0.82)                            | -1.62 (3.58)                                             | -0.09 (3.63)                                                          |

Note: SE = standard error,  $\Delta$  = difference in values between intervention and control groups.

\*Adjusted for covariates “treated for nerves” and “wages or salaries as source of financial support.”

<sup>†</sup> $p < 0.001$ .

<sup>‡</sup> $p < 0.05$ .

<sup>§</sup> $p < 0.01$ .

Shown in the table are modelled estimates of growth as well as outcome scores at baseline and the third follow-up visit (mean 20.2 months after baseline) after adjustment for 2 covariates (“treated for nerves” and “wages or salaries as source of financial support”). The  $\beta_1$  growth data indicate the slope of the curve (the rate of change as a function of the square root of time [in months]) from study onset to the final follow-up visit. For example, at baseline, the adjusted mean score for mood (as measured by the Center for Epidemiologic Studies Depression (CES-D) Scale<sup>43</sup>) was 18.38 points in the control group and 2.94 points lower in the intervention group; at the third follow-up visit, the mean score decreased to 12.22 points (i.e., mood improved) in the control group and was 2.30 points lower in the intervention group. The rate of change ( $\beta_1$ ) from baseline to the third follow-up visit was -1.45 in the control group and -1.30 in the intervention group (i.e., mood improved slightly in both groups), for a difference of 0.15 between the groups.
